# Supplementary material for: SPC25 as a novel therapeutic and prognostic biomarker and its association with glycolysis, ferroptosis and ceRNA in lung adenocarcinoma
Source: publisher site journal article supplement (doi:10.18632/aging.205418), 2024-01-11
Supplement: Supplementary file [file aging-v16i1-205418-supplementary-material-SD1.pdf]

## SUPPLEMENTARY TABLE

Supplementary Table 1. The sequences for all primers in our study.

| Primer name      | Primer sequence (5'-3')   |
|------------------|---------------------------|
| $\beta$ -actin F | TGGCACCCAGCACAATGAA       |
| $\beta$ -actin R | CTAAGTCATAGTCCGCCTAGAAGCA |
| SLC2A1 F         | CACTGTCGTGTCGCTGTTTG      |
| SLC2A1 R         | CTAGCGCGATGGTCATGAGT      |
| HK2 F            | GGCAAGCAGAGGTTGAGA        |
| HK2 R            | AAGTGTTGCAGGATGGCTCG      |
| GPI F            | AAGGGTCTGCATCACAAGATCC    |
| GPI R            | AGAGTTGGTTGGGCGATTTCC     |
| ALDOA F          | ACATCGCTCACCGCATCGT       |
| ALDOA R          | GGTAGTCTCGCCATTTGTCCC     |
| SPC25 F          | GACACCTCCTGTCAGATGGC      |
| SPC25 R          | TTTGCTGCTGATCTGATTTTGA    |
